CORRECTION

# Correction: Measurement of the Absolute Magnitude and Time Courses of Mitochondrial Membrane Potential in Primary and Clonal Pancreatic Beta-Cells

The *PLOS ONE* Staff

## Notice of Republication

This article was republished on July 19, 2016, to replace incorrect images appearing as Figs 1–8 that were introduced during preparation of the article for publication. The publisher apologizes for the errors.

## Reference

1. Gerencser AA, Mookerjee SA, Jastroch M, Brand MD (2016) Measurement of the Absolute Magnitude and Time Courses of Mitochondrial Membrane Potential in Primary and Clonal Pancreatic Beta-Cells. *PLoS ONE* 11(7): e0159199. doi:[10.1371/journal.pone.0159199](https://doi.org/10.1371/journal.pone.0159199) PMID: [27404273](https://pubmed.ncbi.nlm.nih.gov/27404273/)

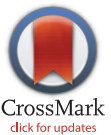

## OPEN ACCESS

**Citation:** The *PLOS ONE* Staff (2016) Correction: Measurement of the Absolute Magnitude and Time Courses of Mitochondrial Membrane Potential in Primary and Clonal Pancreatic Beta-Cells. *PLoS ONE* 11(7): e0160395. doi:[10.1371/journal.pone.0160395](https://doi.org/10.1371/journal.pone.0160395)

**Published:** July 29, 2016

**Copyright:** © 2016 The PLOS ONE Staff. This is an open access article distributed under the terms of the [Creative Commons Attribution License](https://creativecommons.org/licenses/by/4.0/), which permits unrestricted use, distribution, and reproduction in any medium, provided the original author and source are credited.
